# Supplementary material for: High content phenotypic screening identifies serotonin receptor modulators with selective activity upon breast cancer cell cycle and cytokine signaling pathways
Source: PubMed Central journal article supplement (PMC6961118; doi:10.1016/j.bmc.2019.115209), 2020-01-01
Supplement: mmc1.pdf [file mmc1.pdf]

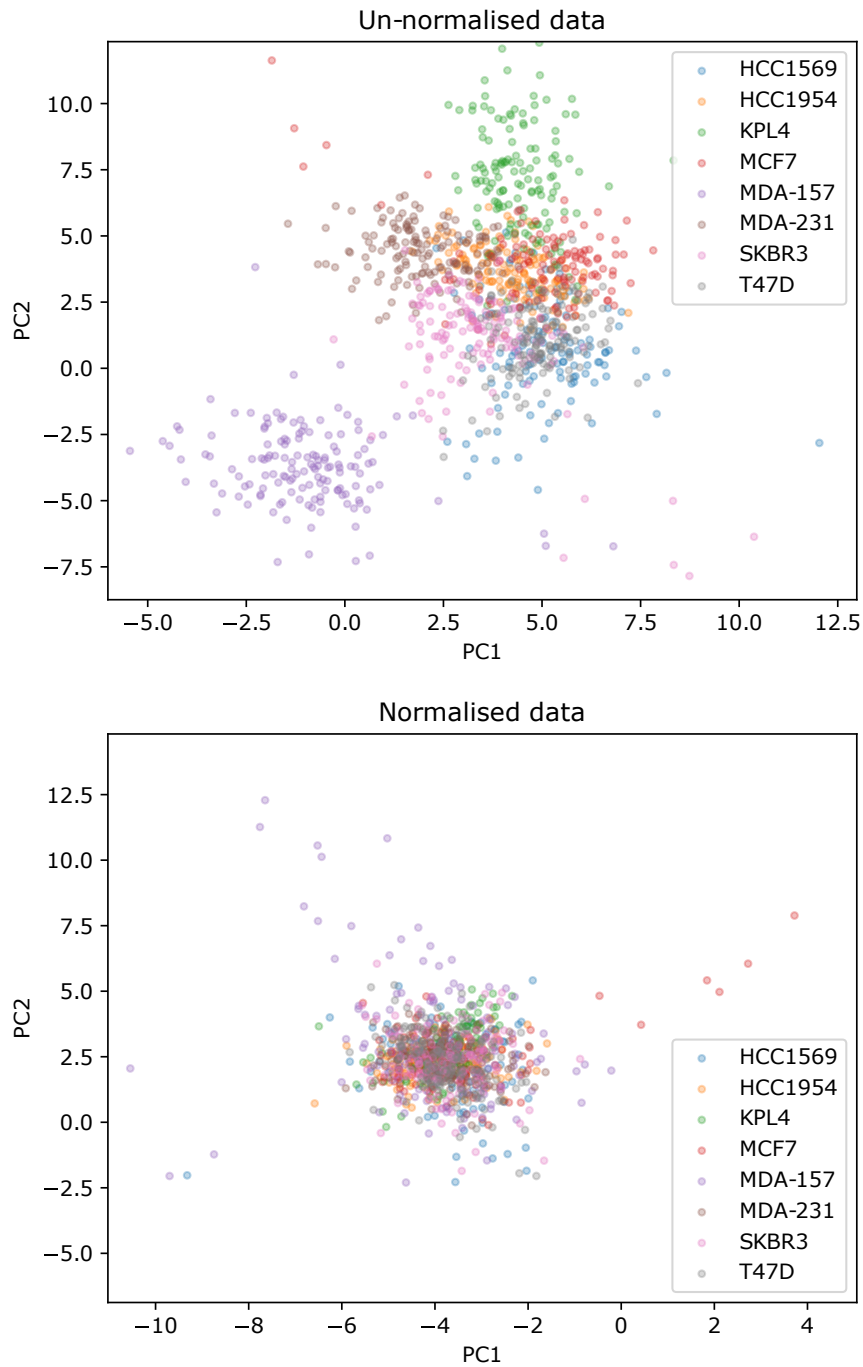

Supplementary Figure S1. Comparison of pre- and post-normalisation of basal cell morphology. Principal component analysis of pre- and post-normalised cell line features demonstrating the removal of inherent cell line morphological differences.
